# Supplementary material for: SARS-CoV-2 Infection among School Population of One Developing Country. Do School Closures Protect Students and Teachers against SARS-CoV-2 Infection?
Source: MDPI journal article supplement (doi:10.3390/ijerph182312680), 2021-12-01
Supplement: s1 [file s1]

### **Supplemental Material. S1 (Only the data analyzed for the study are shown)**

Online questionnaire “Reporte de alertas tempranas por enfermedad respiratoria”

Online questionnaire “Report of early alerts for respiratory disease”

#### **Datos referentes a la persona sobre la que se realiza el reporte (Data referring to the person on whom the report is made)**

1. Tipo de actor sobre el cual se reporta la alerta (Pregunta de selección múltiple con única respuesta)  
Type of actor about which the alert is reported (Multiple-choice question with only answer)
  - Estudiantes (Students)
  - Docentes (Schoolteachers)
  - Directivo Docente (Teaching director)
  - Docente Orientador (Guidance teacher)
  - Administrativos (Administrative)
  - Personas de servicios generales o de apoyo (General or support service staff)
  - Padre, Madre o cuidador (Father, Mother or caregiver)
  - Familiar extenso con el que se convive (Extended family member with whom you live)
2. Edad (pregunta abierta) Age (Open question)
3. Género (pregunta cerrado) Gender (closed question)
  - Femenino (Female)
  - Masculino (Male)
  - Otro (Other)
4. Localidad de residencia de la persona (pregunta abierta) Place of residence of the person (open question)

#### **Datos de alerta (Alert data)**

1. Seleccione si presenta alguno o algunos de los siguientes síntomas (Pregunta de selección múltiple con única respuesta). Select if you have any or some of the following symptoms (Multiple-choice question with only answer)
  - Secreciones nasales. Runny or stuffy nose
  - Dolor de garganta. Sore Throat
  - Tos. Cough
  - Fiebre. Fever
  - Malestar general. Malaise
  - Dificultad para respirar. Difficulty breathing or shortness of breath
  - Pérdida del sentido del gusto o el olfato. New loss of taste or smell
  - Inflamación de pies o manos. Swollen hands or feet
  - Erupciones en la piel. Skin rash
  - Asintomático. Asymptomatic
2. ¿Le han practicado prueba para COVID-19? (pregunta cerrada). Did you be tested for COVID-19? (Closed question).
  - Si (Yes)
  - No (No)

**Supplemental Material. S2 (Only the data analyzed for the study are shown)**

Retrospective telephone interview

Encuesta "Reporte de Alertas Tempranas por Enfermedad Respiratoria" para estudiantes, docentes y administrativos diseñada por la Universidad Nacional de Colombia

Survey "Report of Early Alerts for Respiratory Illness" for students, teachers and administrators designed by the National University of Colombia

**Módulo Indicadores salud (Health indicators module)**

pe\_1 **Durante el último mes, ¿ha tenido síntomas de problemas respiratorios?. During the past month, have you had symptoms of breathing problems**

Si (Yes)

No (No)

Nsnr (Does not know or does not answer)

pe\_1\_1 **¿Consultó al médico por los síntomas de problemas respiratorios? Did you see a doctor for symptoms of breathing problems?**

Si (Yes)

No (No)

Nsnr (Do not know not answer)

pe\_1\_1\_1 **¿Por cuáles síntomas respiratorios consultó? For what respiratory symptoms did you consult?**

pe\_1\_1\_1 Tos (Cough)

pe\_1\_1\_1 Fiebre (Fever)

pe\_1\_1\_1 Congestión nasal (Runny or stuffy nose)

pe\_1\_1\_1 Dificultad respiratoria (Difficulty breathing or shortness of breath)

pe\_1\_1\_1 Dolor torácico (Chest pain)

pe\_1\_1\_1 Malestar general (Malaise)

pe\_1\_1\_1 Cansancio excesivo (Fatigue-tiredness)

pe\_1\_1\_1 Dolor de garganta (Sore Throat)

pe\_1\_1\_1 nsnr Does not know or does not answer)

pe\_5 **¿A su Hijo/a le han hecho examen médico para saber si tiene COVID-19?---¿Te han hecho algún examen médico para saber si tienes Coronavirus? Has your child had a medical exam to find out if he / she has COVID-19? --- Have you had a medical exam to find out if you have Coronavirus?**

Si (Yes)

No (No)

pe\_5\_1 **¿Cuál fue el resultado? Which it was the result?**

Positivo (Positive)

Negativo (Negative)

Pendiente (Pending)
